# Supplementary material for: Oral Excretion Kinetics of Food-Additive Silicon Dioxides and Their Effect on In Vivo Macrophage Activation
Source: MDPI journal article supplement (doi:10.3390/ijms25031614), 2024-01-28
Supplement: s1 [file s1]

Article

# Oral Excretion Kinetics of Food-Additive Silicon Dioxides and Their Effect on In Vivo Macrophage Activation

Ri-Ye Kwon, Su-Min Youn and Soo-Jin Choi \*

Division of Applied Food System, Major of Food Science & Technology, Seoul Women's University, Seoul 01797, Republic of Korea; mystic2121@swu.ac.kr (R.-Y.K.); smyoun@swu.ac.kr (S.-M.Y.)

\* Correspondence: sjchoi@swu.ac.kr; Tel.: +82-2-970-5634; Fax: +82-2-970-5977

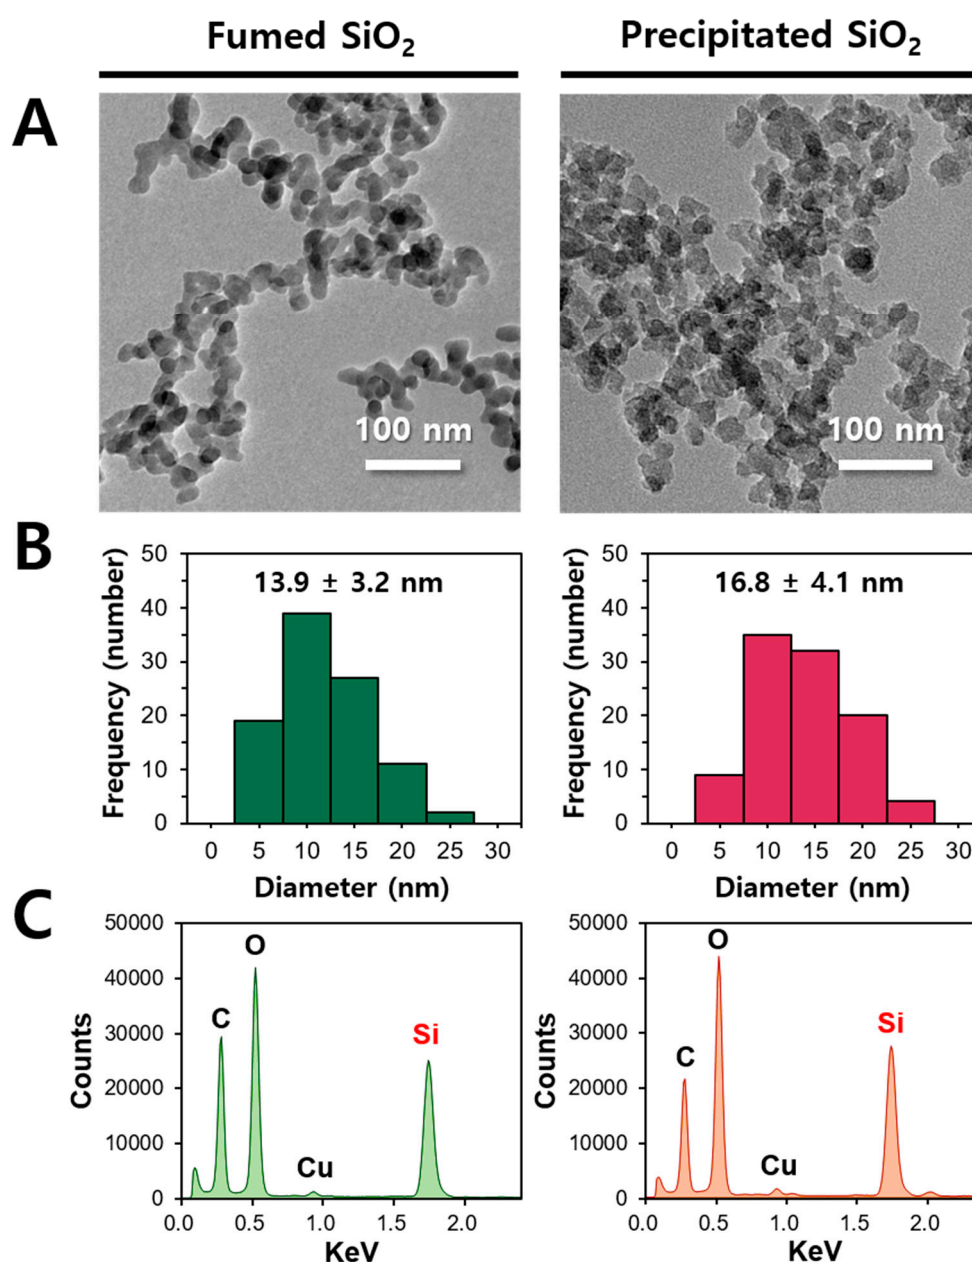

**Figure S1.** (A) Transmission electron microscopy (TEM) images, (B) size distribution, and (C) energy dispersive X-ray spectroscopy (EDS) of fumed and precipitated  $\text{SiO}_2$ . Size distributions and average particle sizes were obtained by randomly selecting 100 particles from the TEM images. No significant differences between fumed  $\text{SiO}_2$  and precipitated  $\text{SiO}_2$  were found ( $P > 0.05$ ).
